# Supplementary material
Source: PubMed Central journal article supplement (PMC3857635)

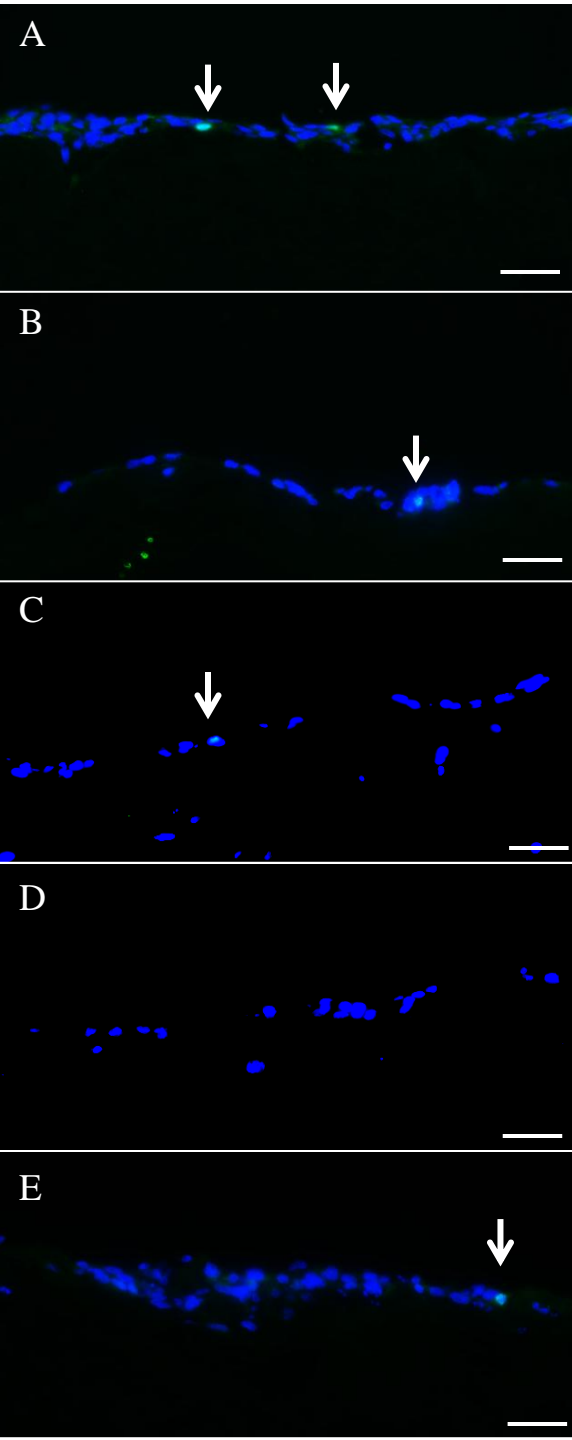

F

## Proliferation

Percent cells with positive Ki67  
per total cell count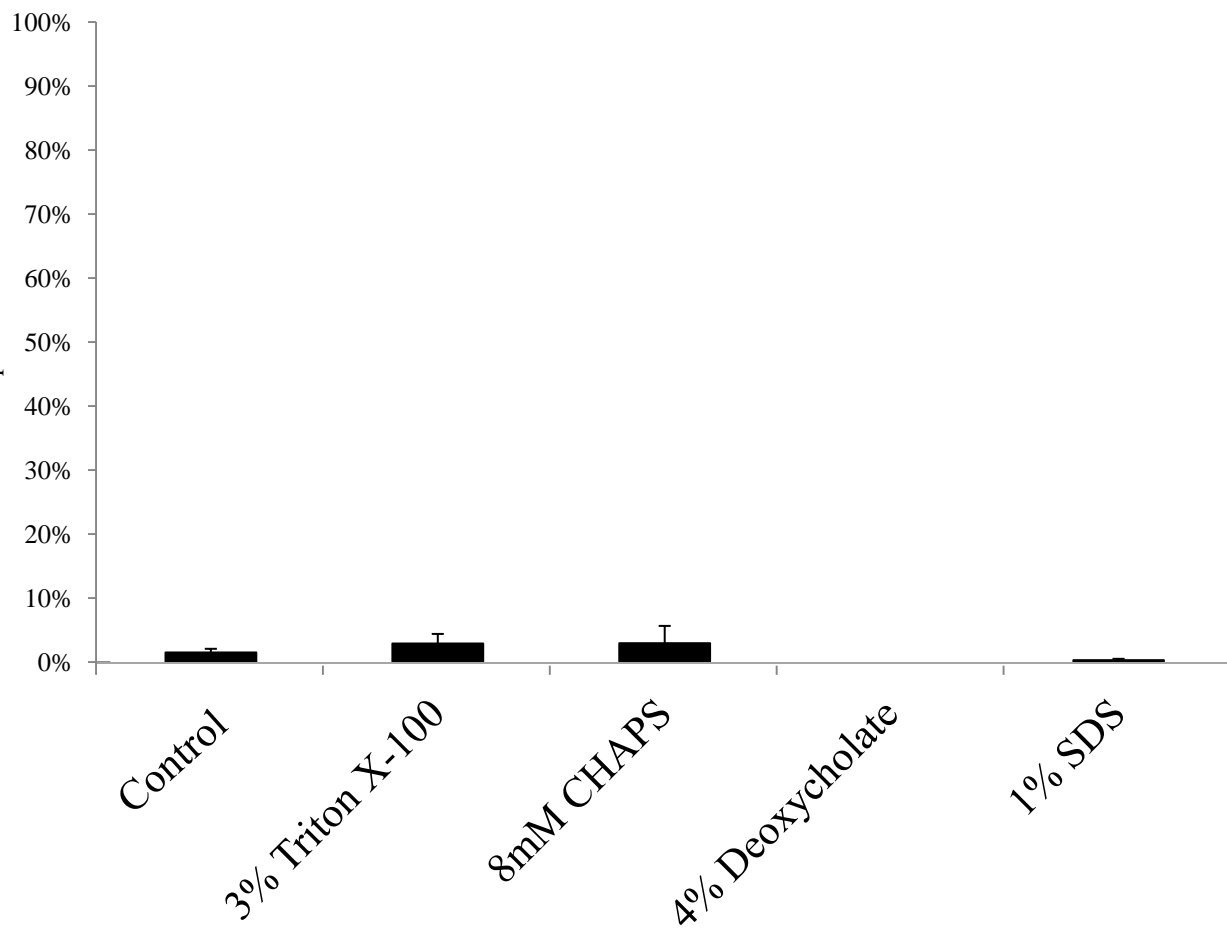

**Supplemental Figure 2**

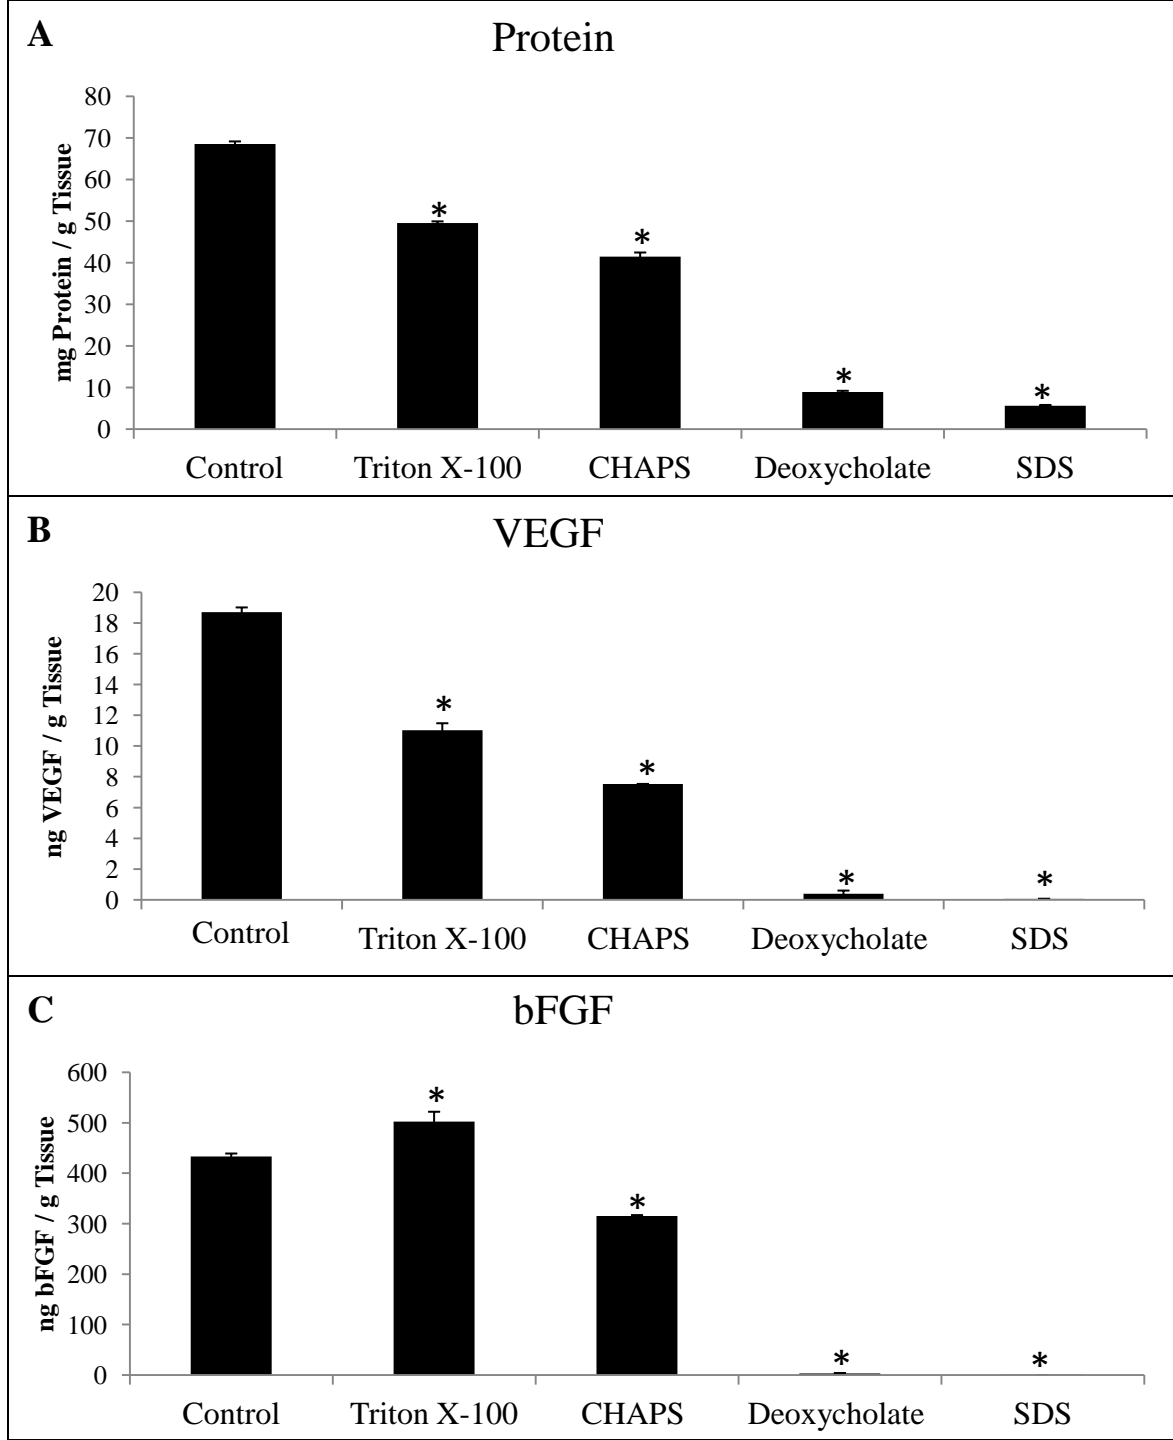

**Supplemental Figure 3**

**A**

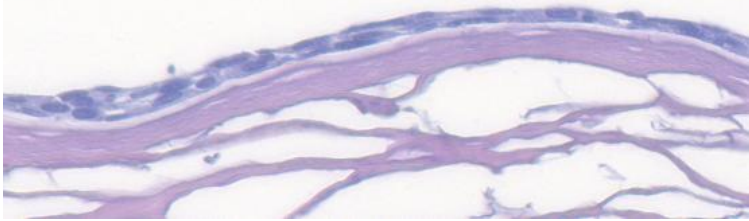

Confluent Score = 100

**B**

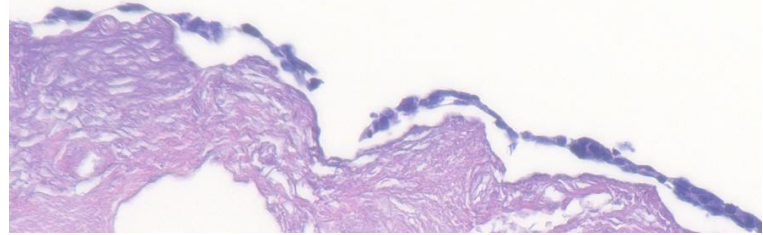

Confluent Score = 85

**C**

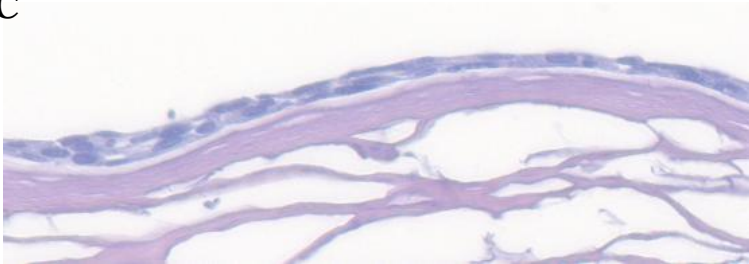

Phenotype Score = 100

**D**

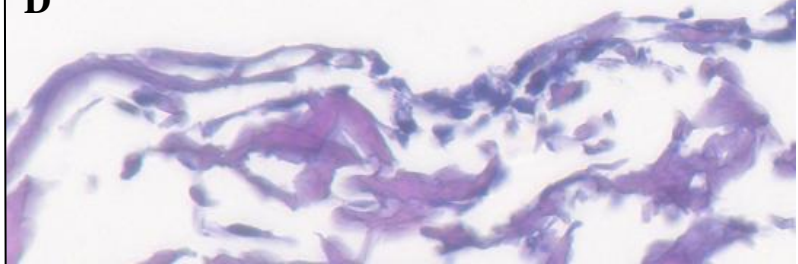

Phenotype Score = 60

**E**

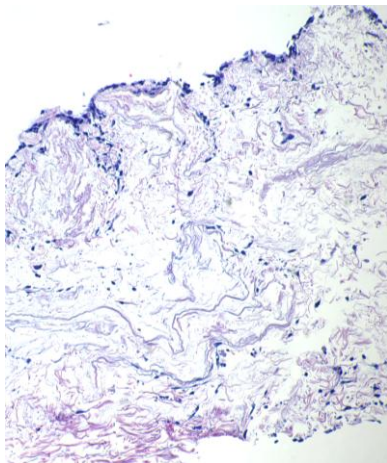

Infiltration Score = 100

**F**

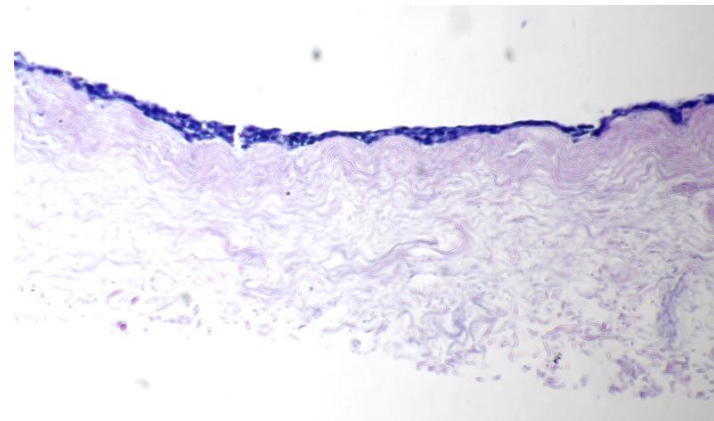

Infiltration Score = 0

Supplemental Figure 4

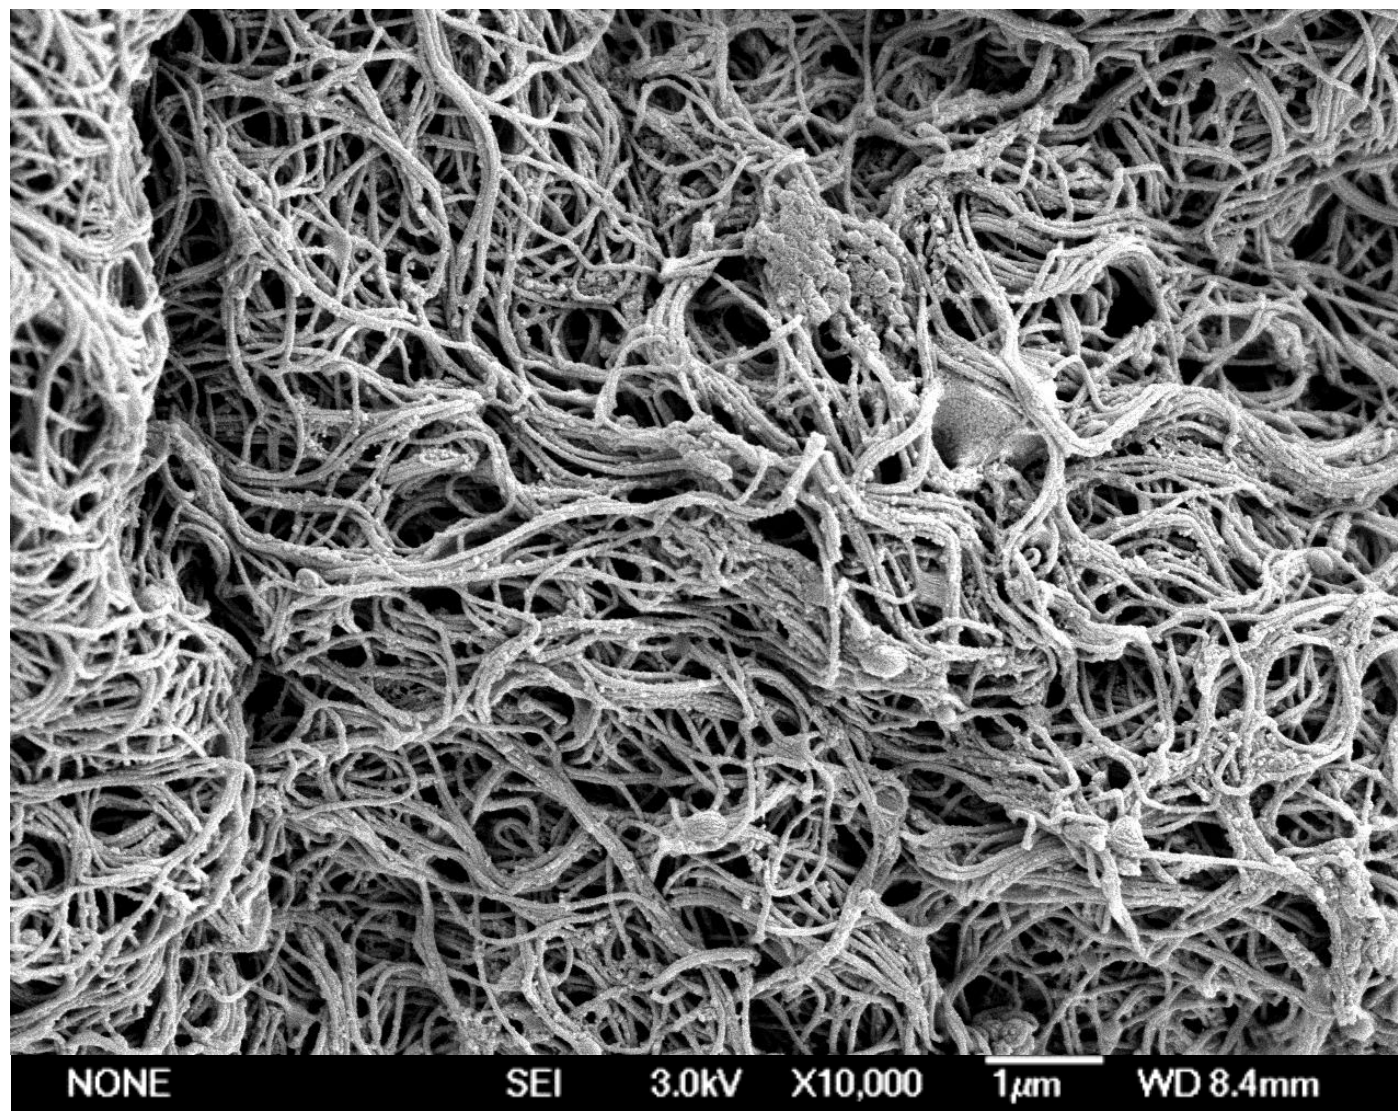

**Supplemental Figure 5**

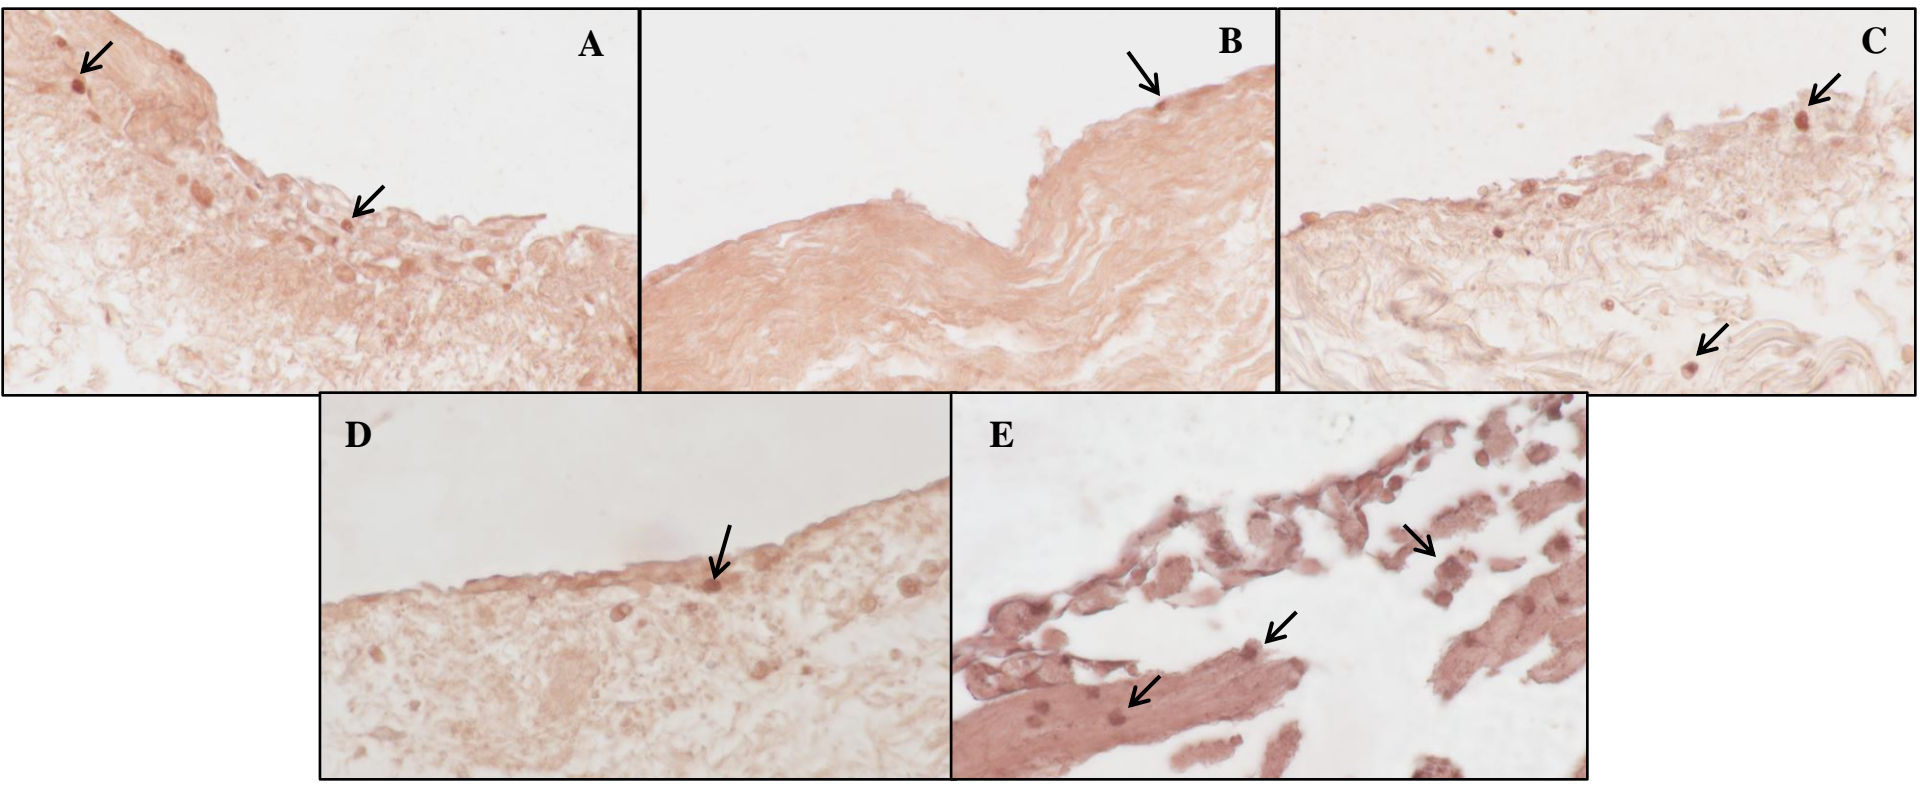

Supplement: NIHMS531648-supplement-01.pdf [file NIHMS531648-supplement-01.pdf]
